# Supplementary material for: Transient Dimers of Allergens
Source: PubMed Central journal article supplement (PMC2816702; doi:10.1371/journal.pone.0009037), 2010-02-05
Supplement: pone.0009037.s001.pdf [file pone.0009037.s001.pdf]

**Table S1.** Calculated and measured masses for the selected (monomeric) allergens

| Allergen             | MW(calcd) Da <sup>1</sup> | MW(meas) Da <sup>2</sup> |
|----------------------|---------------------------|--------------------------|
| nBos d 5 (A/B)       | 18 362/18 276             | 18 362/18 276            |
| rBos d 5B            | 18 276                    | 18 276                   |
| rBos d 5B-H146P      | 18 236                    | 18 236                   |
| Alt a 1 <sup>3</sup> | 14 664                    | 15 237                   |
| Mal d 1              | 17 567                    | 17 566                   |
| Dau c 1              | 17 338                    | 17 337                   |
| Api g 1              | 16 188                    | 16 188                   |
| Hev b 8              | 13 903                    | 13 900                   |
| Phl p 6              | 11 790                    | 11 789                   |

<sup>1</sup> Calculated (average) mass based on the protein sequence (SwissProt, EMBL)

<sup>2</sup> Measured mass, averaged over observed charge state distributions (average uncertainty  $\pm 1$  Da). Mass measurements were performed with ESI FT-ICR instrument, employing denaturing solution conditions (MeCN/H<sub>2</sub>O/HOAc, 49.5:49.5:1.0, v/v) in which all allergens dissociated into monomers.

<sup>3</sup> The reason for the difference between calculated and measured masses is unknown; It is not apparent, however, if the expression vector construct of recombinant Alt a 1 from Biomay differs from that predicted based on the SwissProt sequence.
